# Supplementary material for: CRISPR/Cas9 Genome Editing of Epidermal Growth Factor Receptor Sufficiently Abolished Oncogenicity in Anaplastic Thyroid Cancer
Source: Hindawi journal article supplement (doi:10.1155/2018/3835783), 2018-01-01

Supplementary figure 1

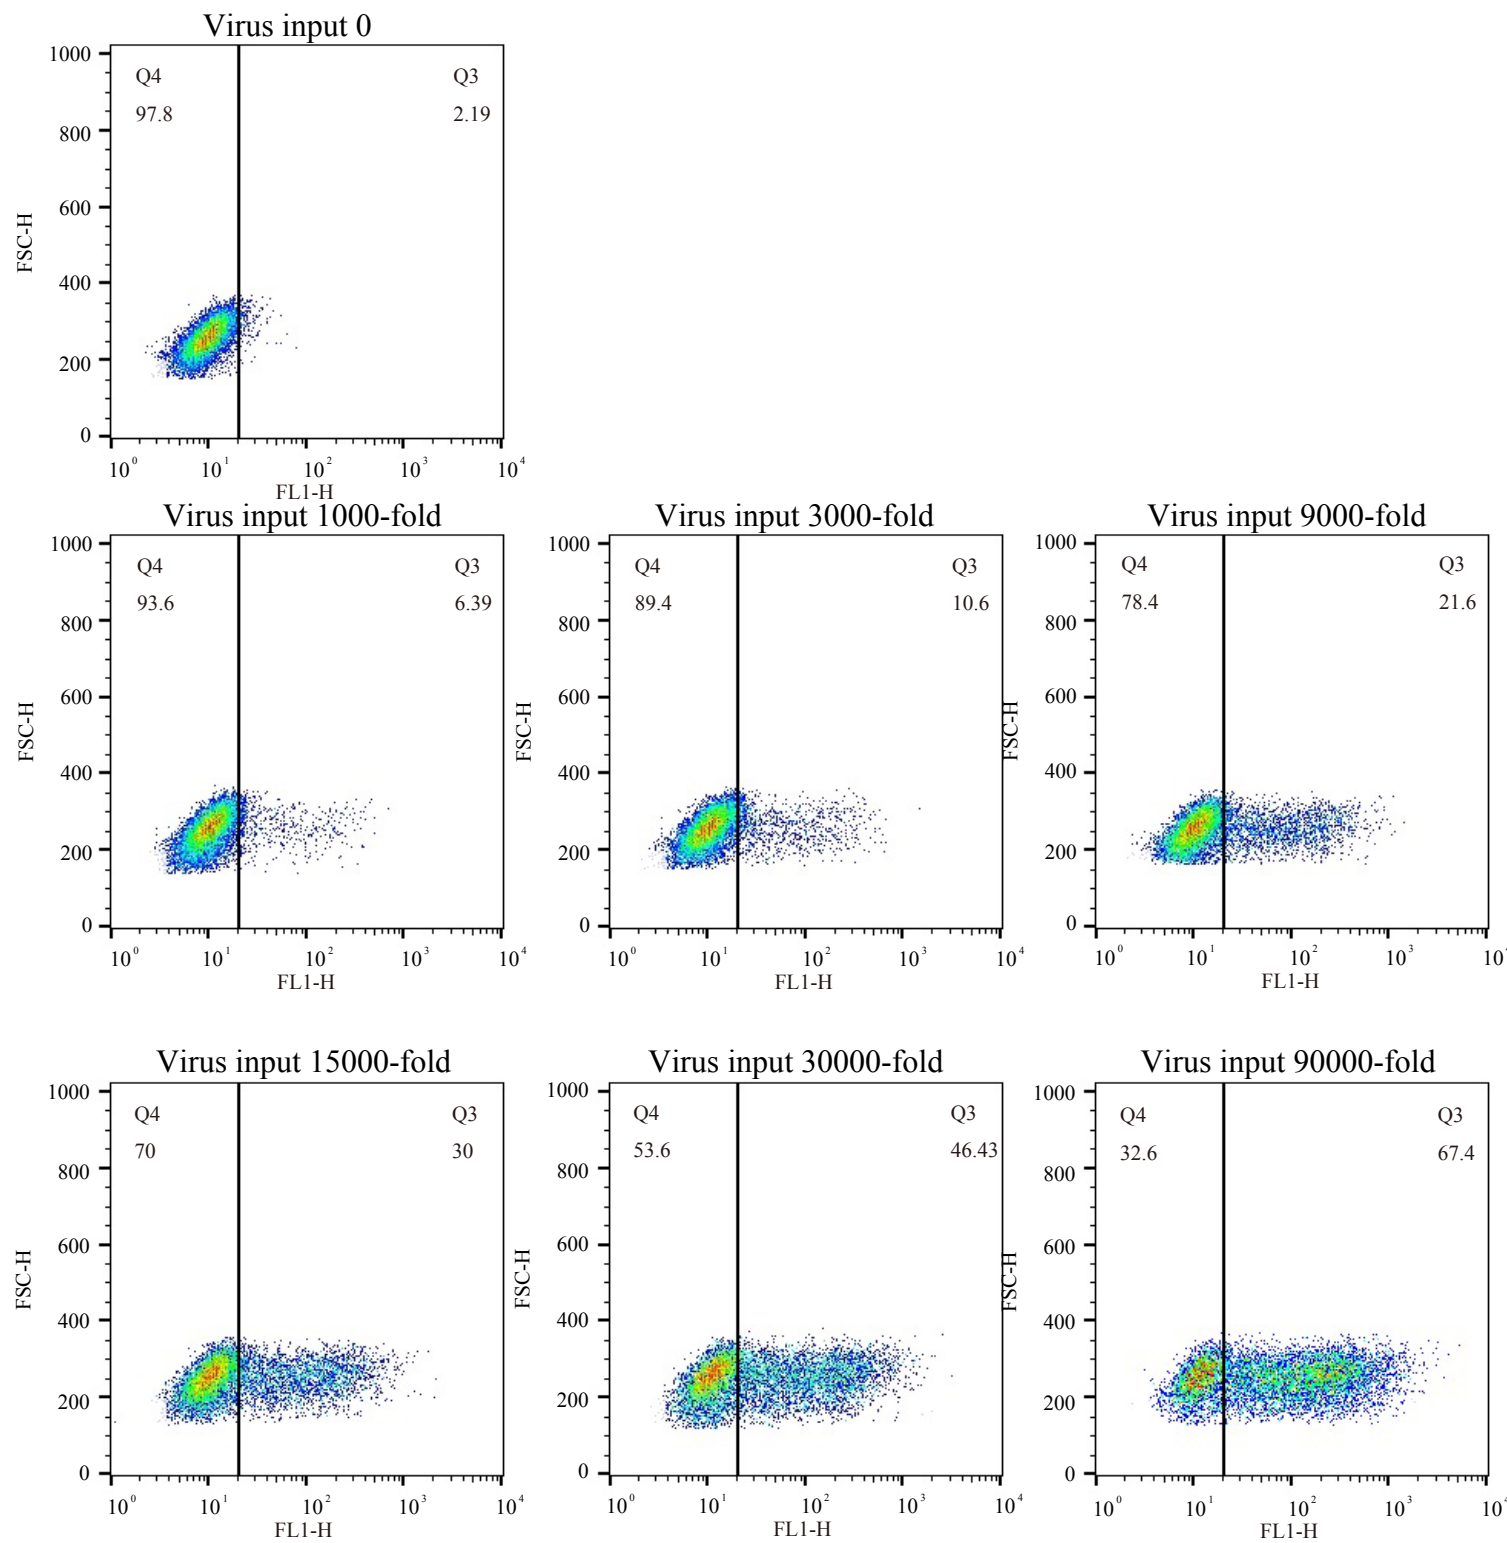

Supplement: f2 [file 3835783.f2.pdf]
